# Supplementary material
Source: publisher figshare collection journal article supplement (https://acs.figshare.com/ndownloader/files/3763858)

# A one-pot selective homodimerisation/hydrogenation strategy for sequential dicarba bridge formation

James Burnley, W. Roy Jackson and Andrea J. Robinson

School of Chemistry, Monash University, Clayton, 3800, Victoria, Australia

Andrea.robinson@monash.edu. Fax: 61 03 9905 4597; Tel: 61 03 9905 4553

## Contents:

### Reaction screening

|                                         |        |
|-----------------------------------------|--------|
| Assessment of AM                        | page 1 |
| Reduction/deprotection                  | page 2 |
| Chemoselectivity of AM                  | page 4 |
| Copies of carbon and proton NMR Spectra | page 6 |

## Reaction screening

### S1: Assessment of AM

The dimerisation of (*S*)-methyl 2-benzamido-4-ynoate (**12**) was assessed according to the two following procedures:

Method A: A solution of Schrock's catalyst (tri-*tert*-butoxy(2,2-dimethylpropylidene)tungsten (100 mg/10 mL) was prepared, in dry, degassed toluene to give a clear pale yellow solution (0.02 M).

In a dry box the catalyst solution (1.00 mL, 0.02 mmol, 10 mol%) was added to (*S*)-methyl 2-benzamido-4-ynoate (**12**) (52.0 mg, 0.20 mmol) and optionally 5 Å sieves (100 mg) to give a red solution (0.20 M). The resulting mixtures were heated at the specified temperature and time. The solvent was evaporated *in vacuo* and the residue dissolved in CDCl<sub>3</sub>, filtered through celite<sup>®</sup> then examined by <sup>1</sup>H NMR spectroscopy.

Method B: Anhydrous manganese dichloride (9.0 mg, 0.08 mmol) and Fürstner's catalyst (**7**) (103 mg, 0.08 mmol) in toluene (4 mL) were heated at 80 °C for 30 minutes to give a brown/green solution (0.02 M).

In a dry box the catalyst solution (1.00 mL, 0.02 mmol, 10 mol%) was added to (*S*)-methyl 2-benzamido-4-ynoate (**12**) (52 mg, 0.20 mmol) and 5 Å sieves to give a brown solution (0.20 M). The resulting mixtures were heated at the specified temperature and time. The solvent was evaporated *in vacuo* and the residue dissolved in CDCl<sub>3</sub>, filtered through celite<sup>®</sup> then examined by <sup>1</sup>H NMR spectroscopy.

In each case the conversion was assessed by integration of  $\delta H_a$  4.87 (starting material (**12**)) to  $\delta H_b$  5.00 (dimer (**13**)).

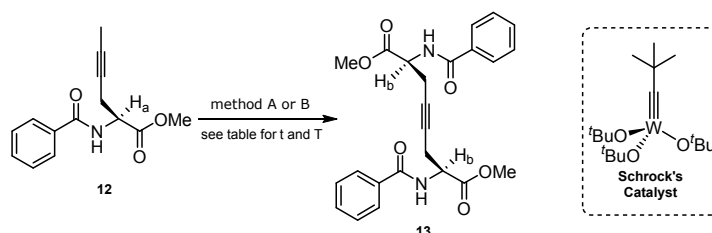

| Entry | Conversion/%    | Method | T/ °C | t/ h | (100 mg) 5 Å sieves |
|-------|-----------------|--------|-------|------|---------------------|
| 1     | 68 <sup>#</sup> | A      | 25    | 4    | No                  |
| 2     | 59 <sup>#</sup> | A      | 50    | 4    | No                  |
| 3     | 73 <sup>#</sup> | A      | 25    | 4    | Yes                 |
| 4     | 59 <sup>#</sup> | A      | 50    | 4    | Yes                 |
| 5     | 88              | A      | 25    | 18   | Yes                 |
| 6     | 42              | B      | 25    | 4    | Yes                 |
| 7     | 89              | B      | 50    | 4    | Yes                 |
| 8     | 95              | B      | 25    | 18   | Yes                 |

<sup>#</sup> Average of two runs.

## S2: Reduction/deprotection

(S)-Methyl 2-(4-(trifluoromethoxy)benzamido)hex-4-ynoate (**4**) (50.0 mg, 0.16 mmol), cobalt carbonyl protected (S)-methyl 2-benzamidohept-4-ynoate (**5**) (52.0 mg, 0.16 mmol) and Wilkinson's catalyst (**8**) (15.0 mg, 0.16  $\mu$ mol) were dissolved in THF (1.6 mL) and hydrogen was reintroduced *via* 3 purge refill cycles (-20 PSI to 90 PSI) and a final pressure of 90 PSI was attained for a further 2 h. The solvent was removed *in vacuo* and ethylenediamine:DCM (5 mL, 1:9) was added and the mixture stirred for 4 h. Water (10 mL) was then added to the mixture and the biphasic solution stirred for 1 h. The mixture was extracted with DCM (3 x 10 mL) and the combined organic extracts washed with brine (10 mL). The resulting organic solvent was dried with sodium sulphate, evaporated *in vacuo* and the residue dissolved in CDCl<sub>3</sub>, filtered through celite<sup>®</sup> then examined by <sup>1</sup>H NMR spectroscopy and low resolution mass spectrometry.

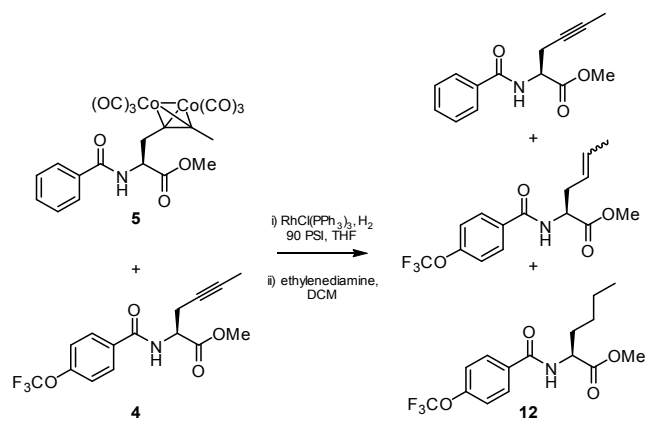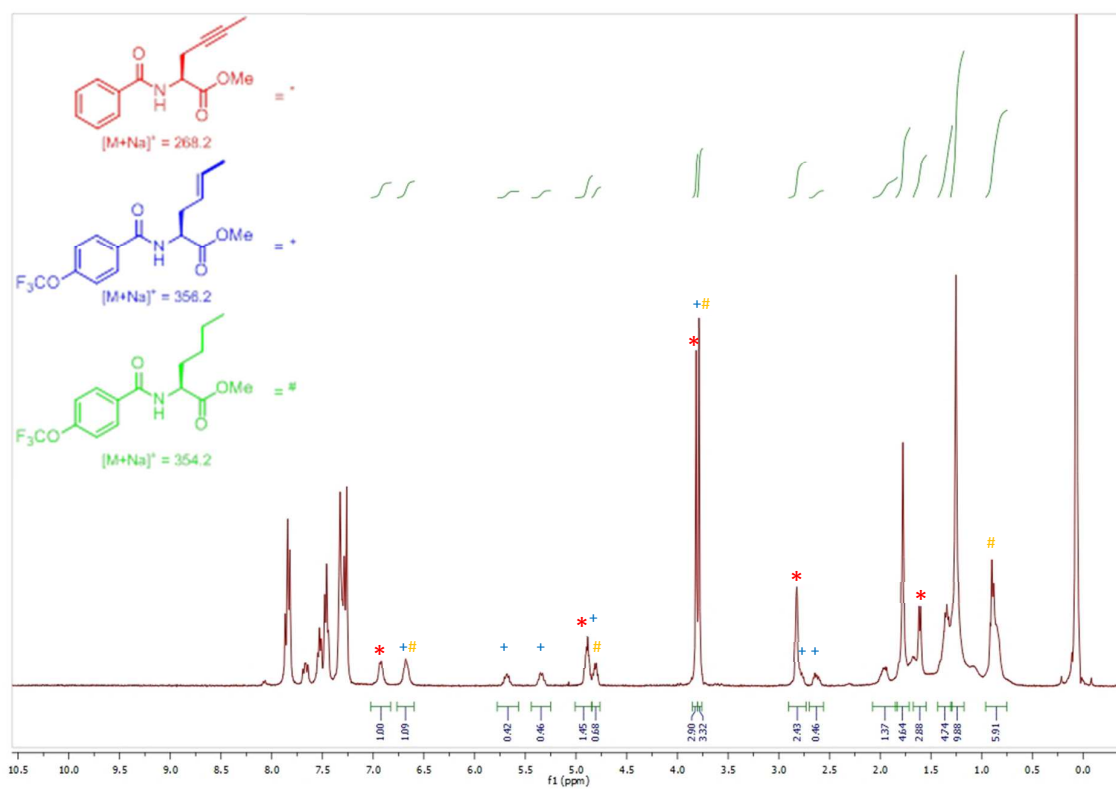

**S3: Alkene/alkyne selectivity**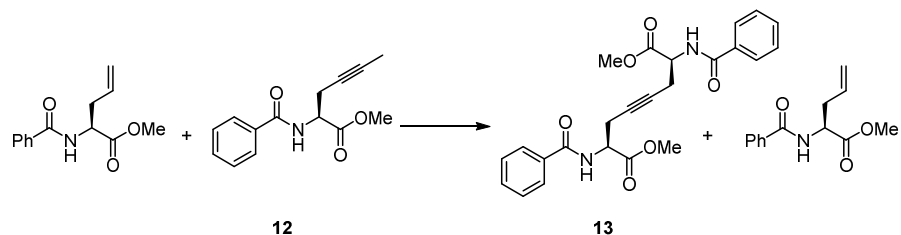

Anhydrous manganese dichloride (9.0 mg, 0.08 mmol) and Fürstner's catalyst (**7**) (103 mg, 0.08 mmol) in toluene (4 mL) were heated at 80 °C for 30 minutes to give a brown/green solution (0.02 M).

In a dry box, the above catalyst solution (1.0 mL, 0.02 mmol, 10 mol%) was added to (S)-methyl 2-benzamido-4-ynoate (**12**) (52.0 mg, 0.20 mmol), (S)-methyl 2-benzamidopent-4-enoate (46.7 mg, 0.20 mmol) and 5 Å sieves to give a brown solution (0.20 M). The resulting mixture was stirred at room temperature for 18 h. The solvent was evaporated *in vacuo* and the residue dissolved in CDCl<sub>3</sub>, filtered through celite® then examined by <sup>1</sup>H NMR spectroscopy and low resolution mass spectrometry.

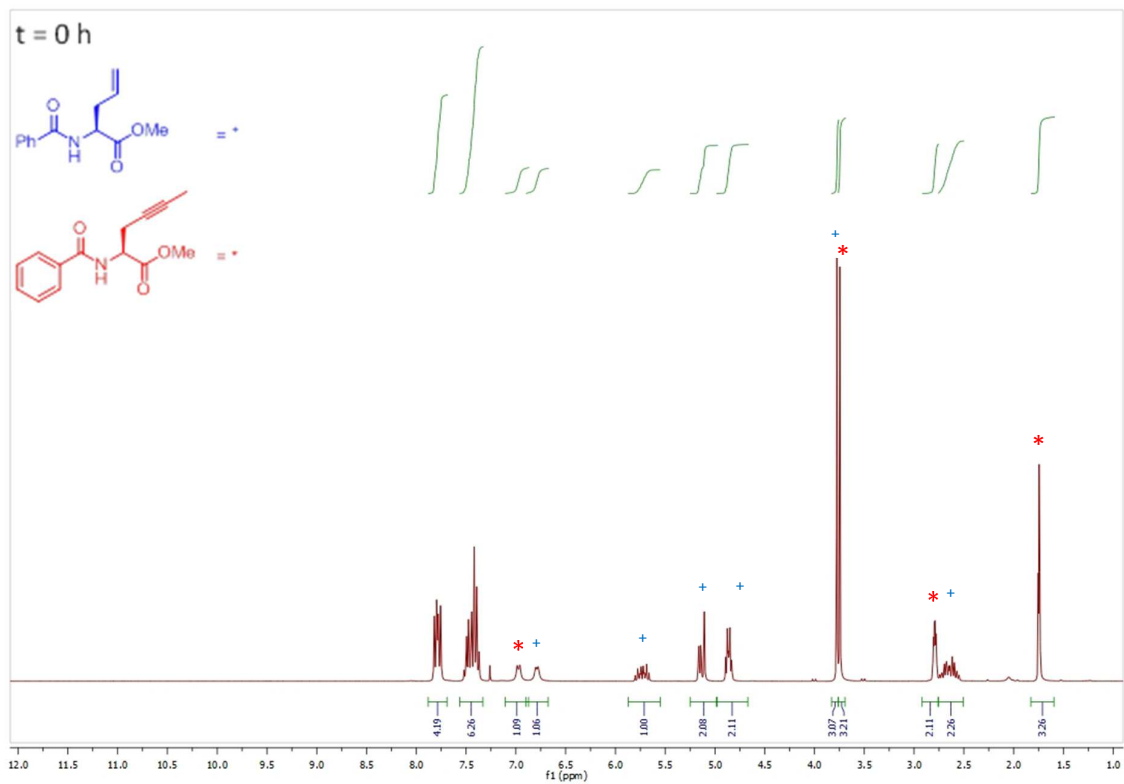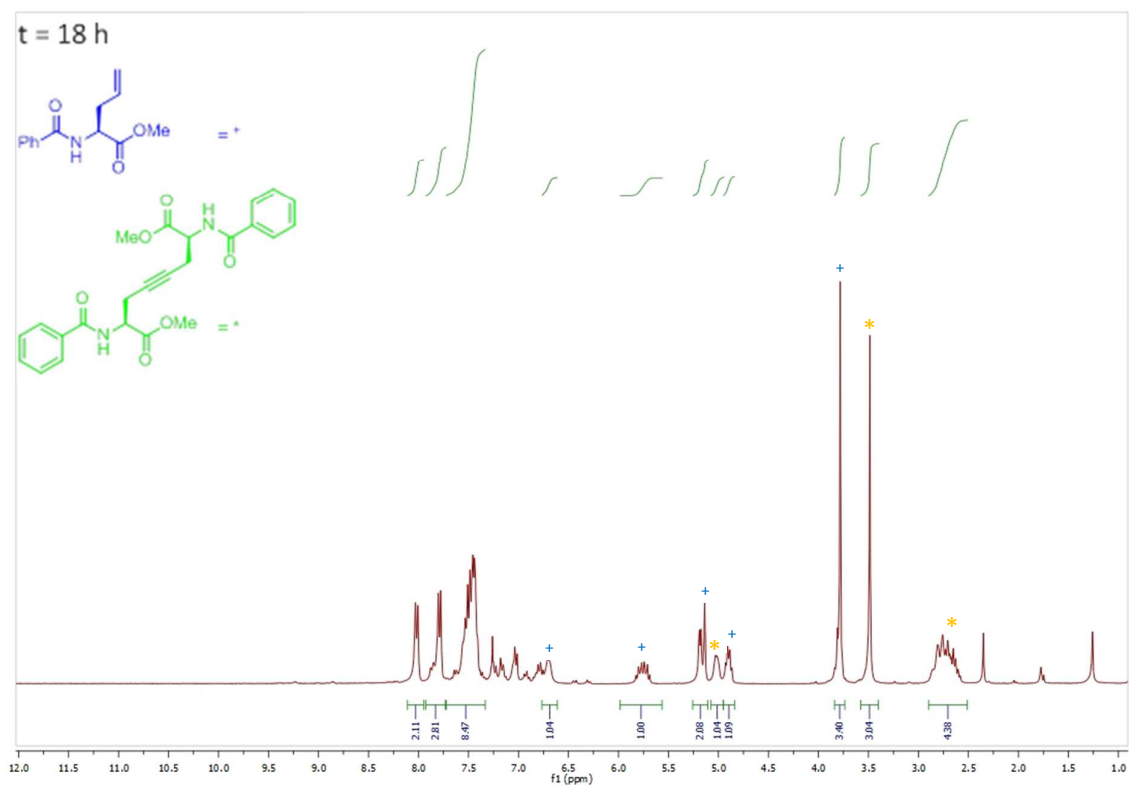

### Copies of proton and carbon NMR spectra for compounds

(S)-Methyl 2-acetamidopent-4-enoate

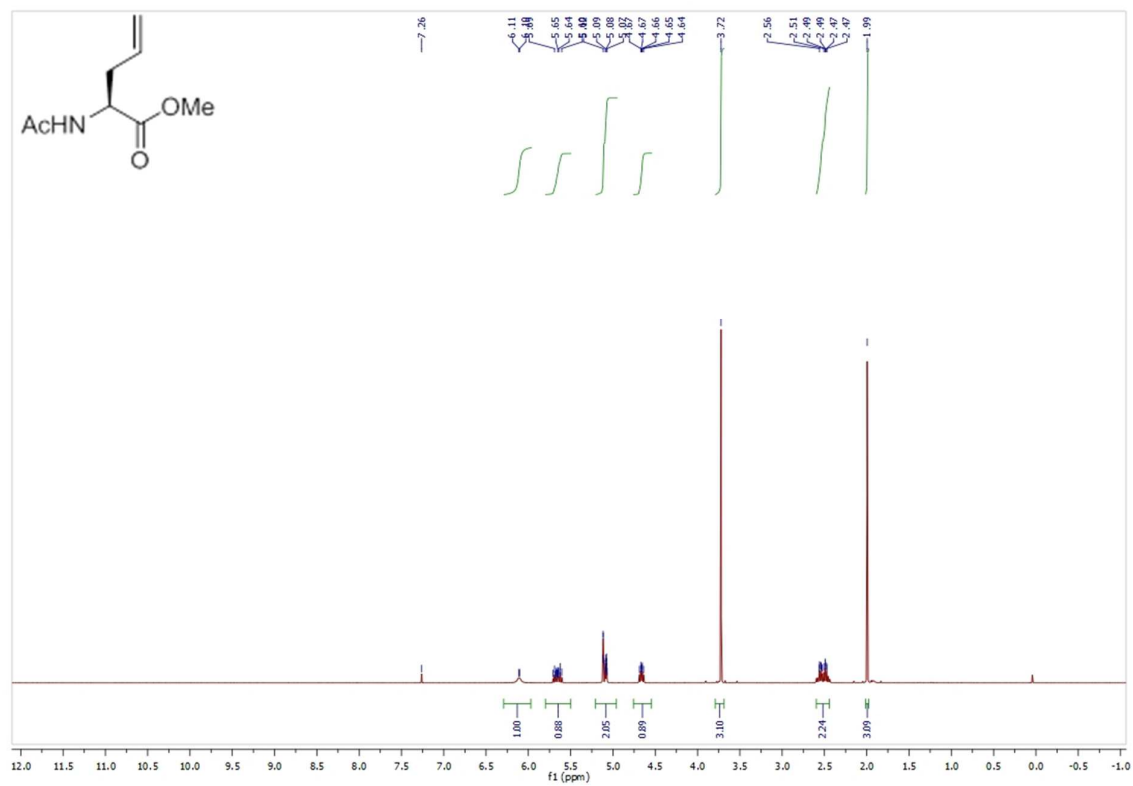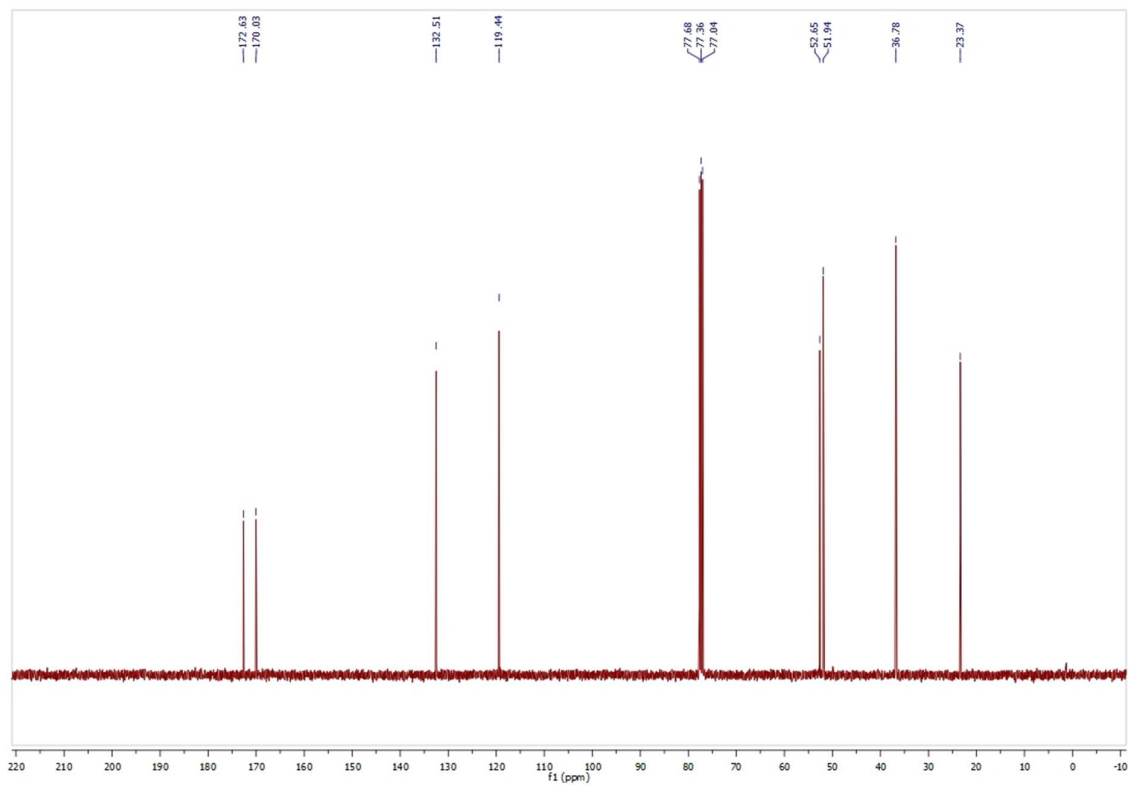(S)-Methyl 2-acetamido-5-methylhex-4-enoate (**6**)

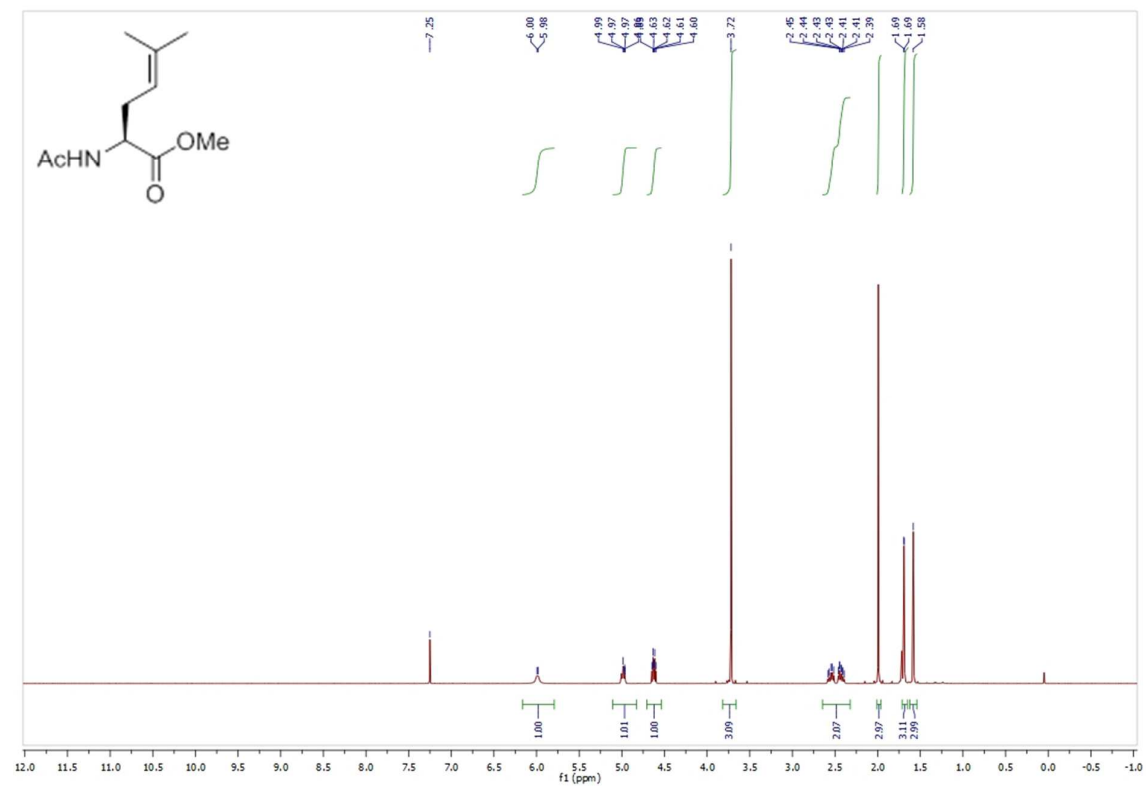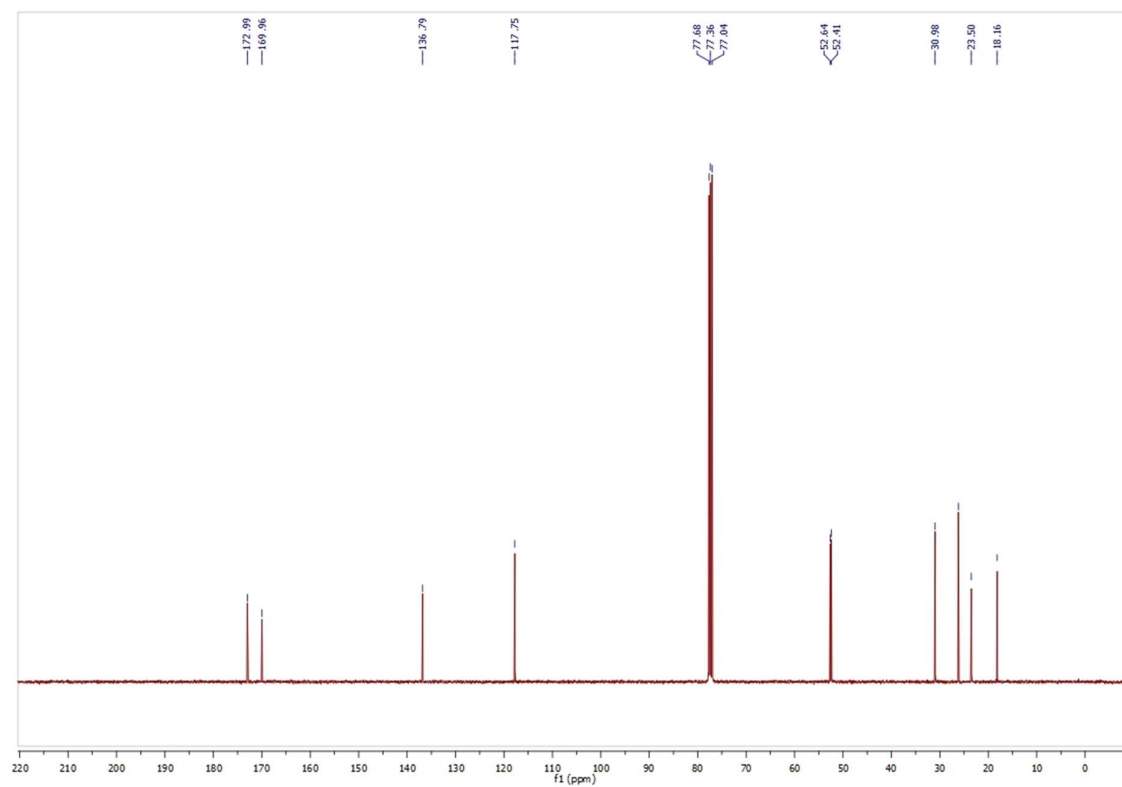

**(S)-Methyl 2-benzamido-4-hexynoate (12)**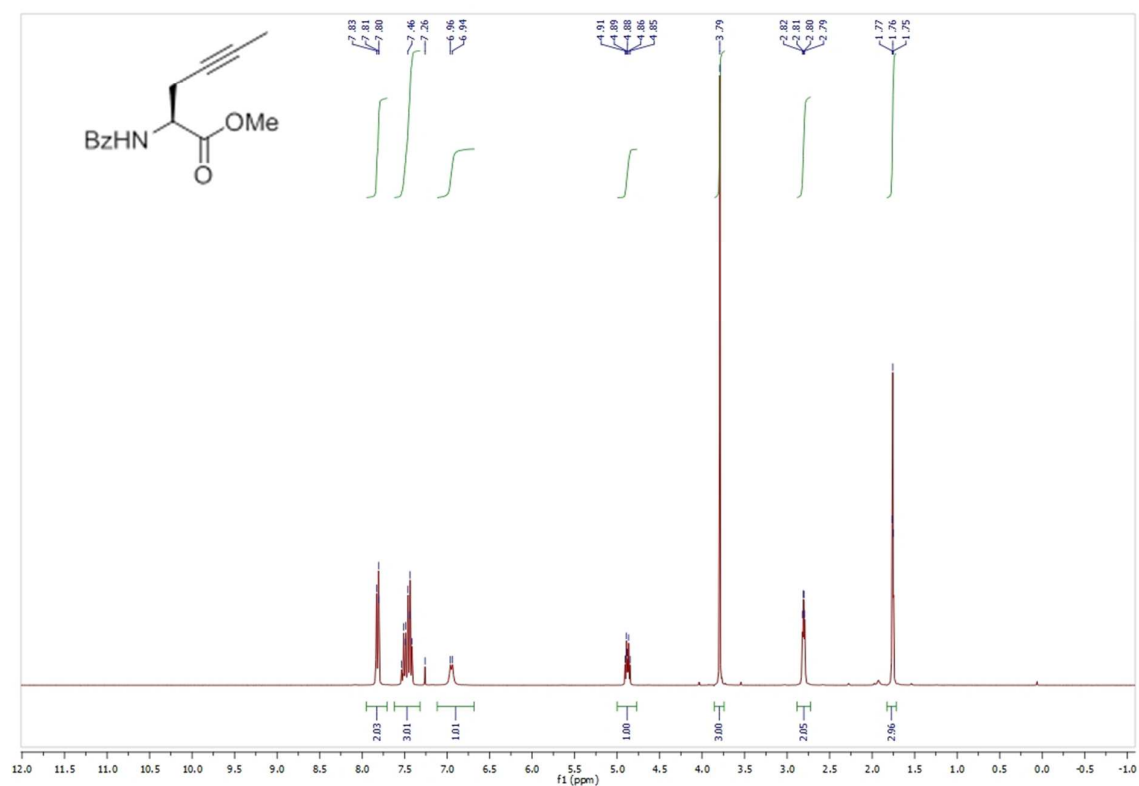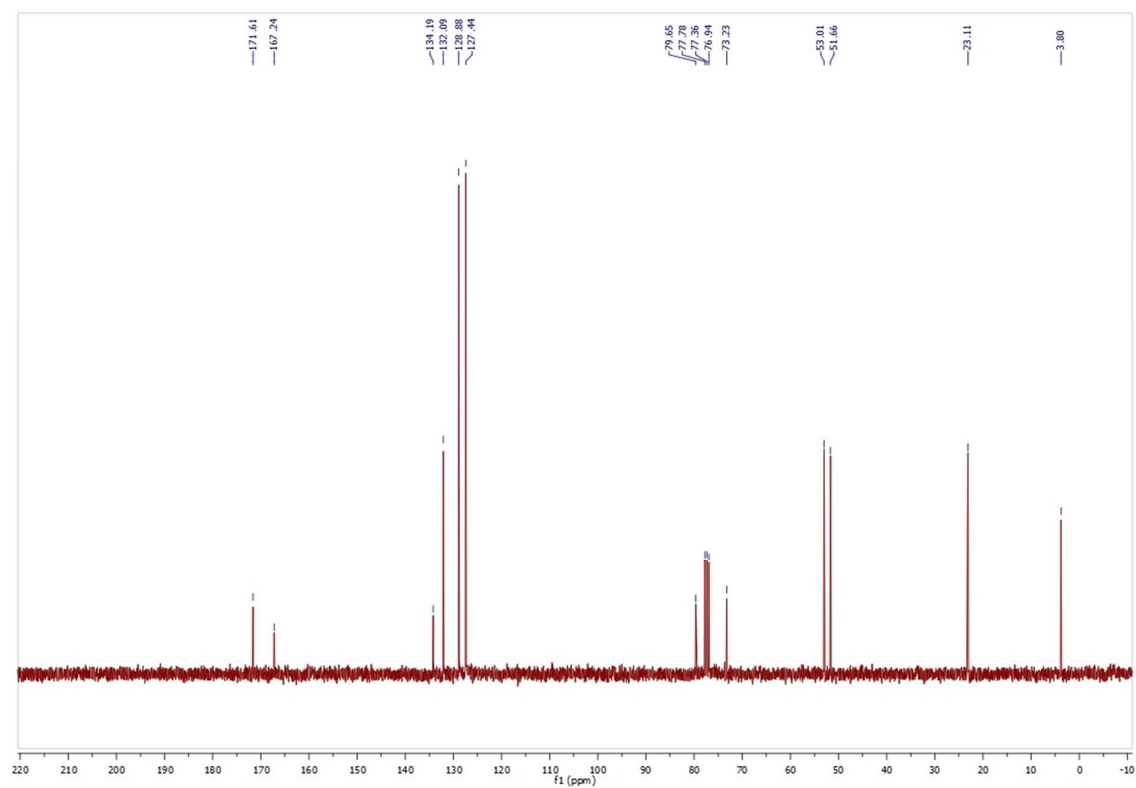



Cobalt-carbonyl protected (S)-methyl 2-benzamidohe-4-ynoate (**5**)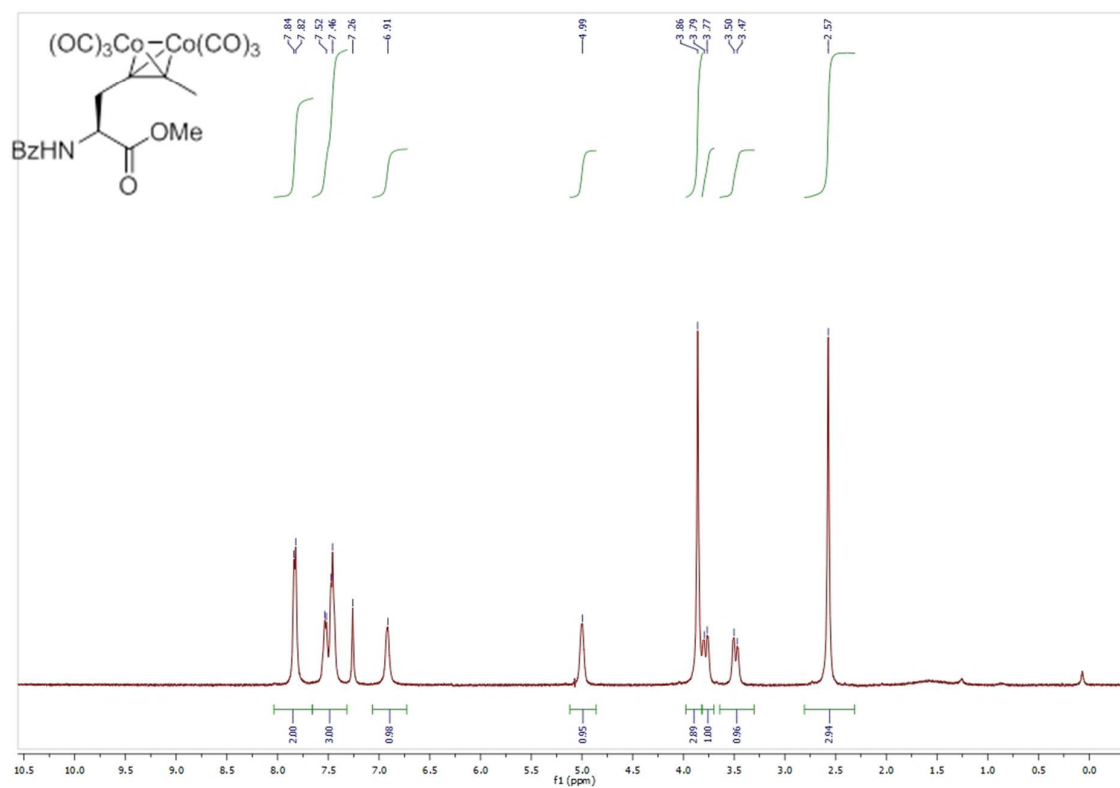

Carbon not obtainable due to peak broadening **5**.

(S)-Methyl 2-(4-(trifluoromethoxy)benzamido)hex-4-ynoate (**4**)

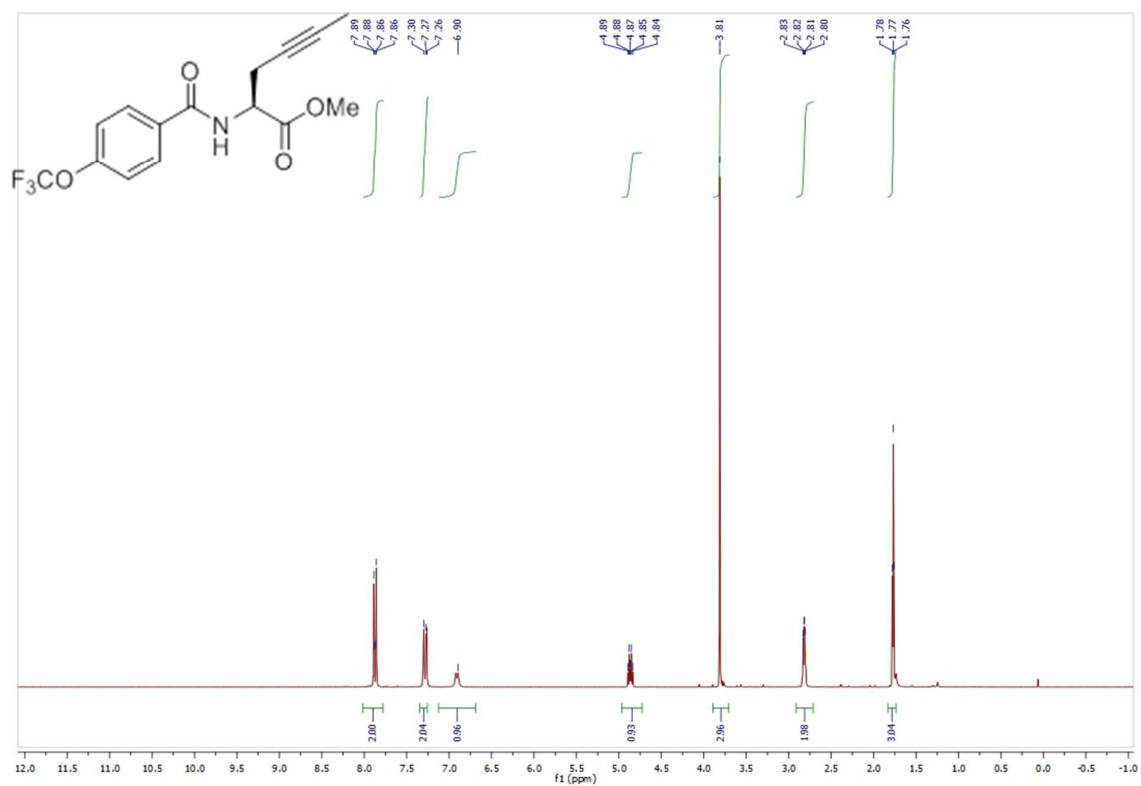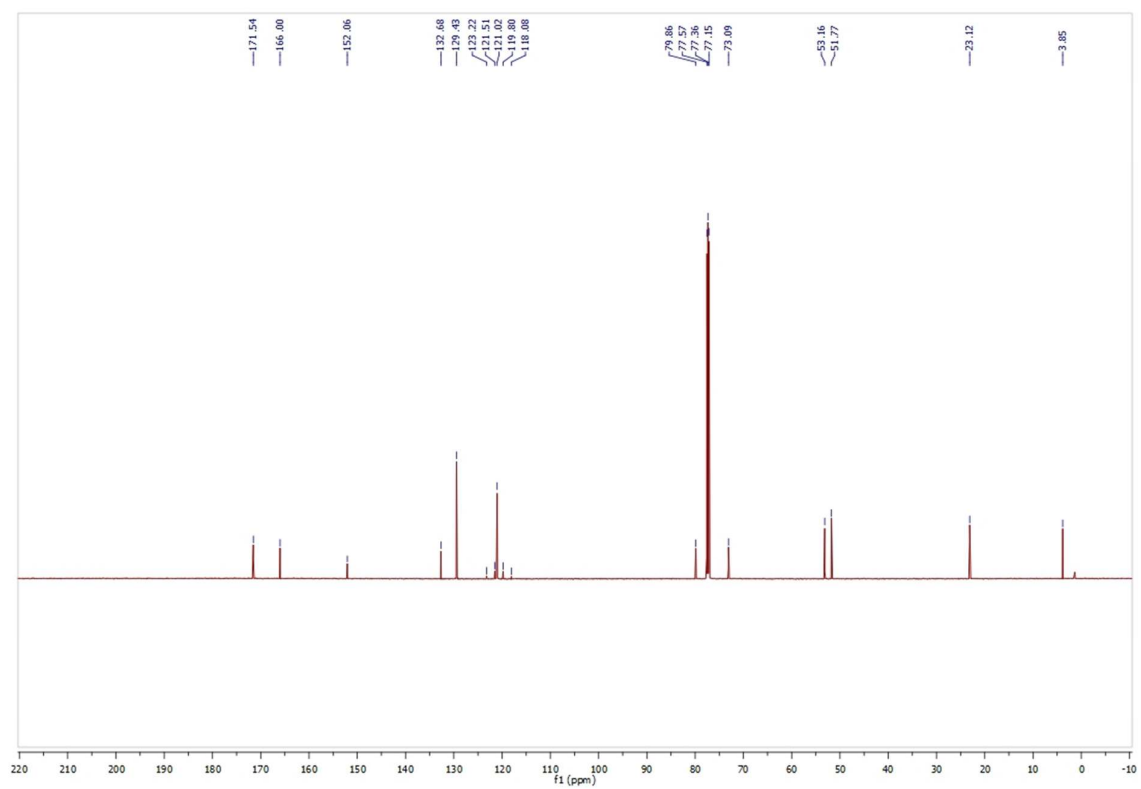(2S,7S)-Dimethyl 2,7-bis(benzamido)oct-4-ynedioate (**13**)

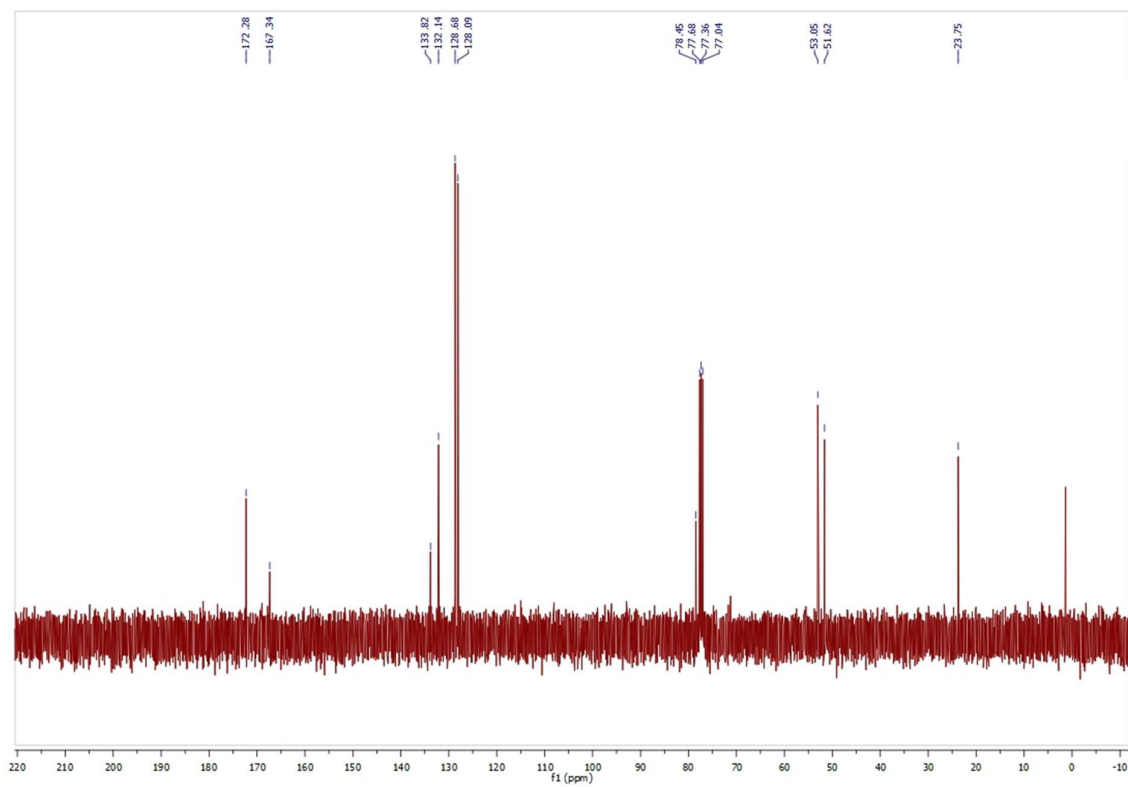

Page S11

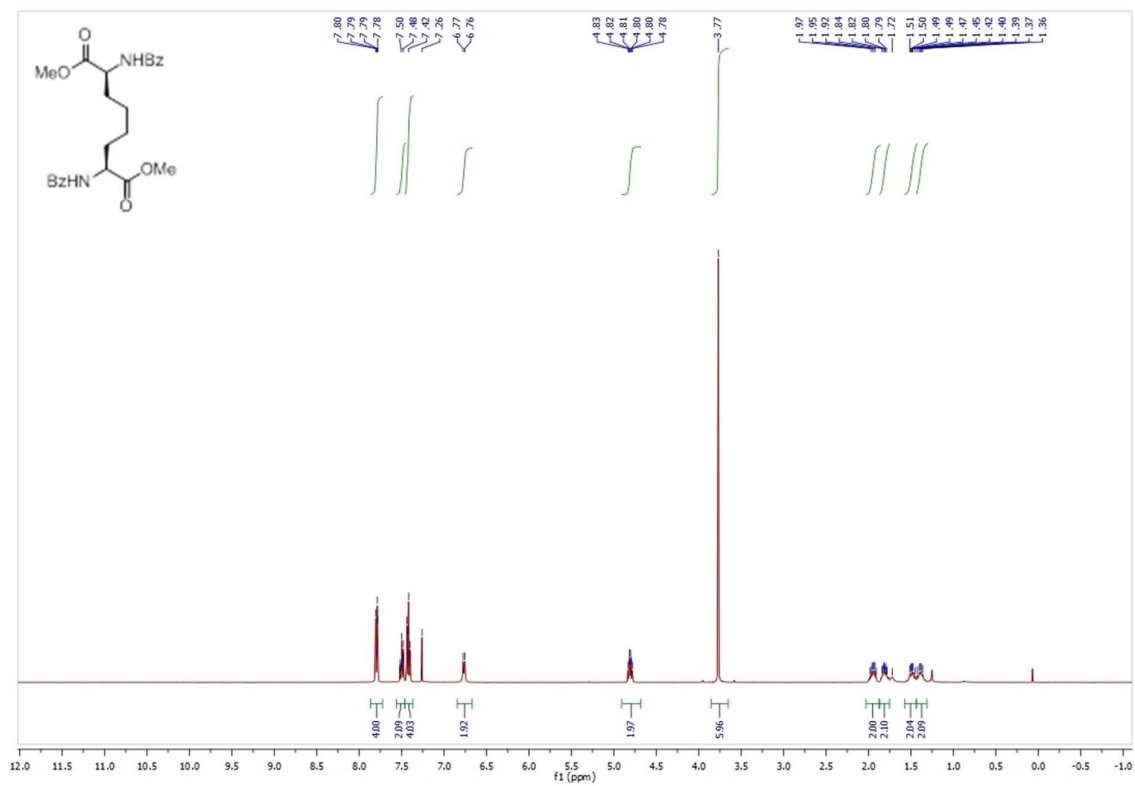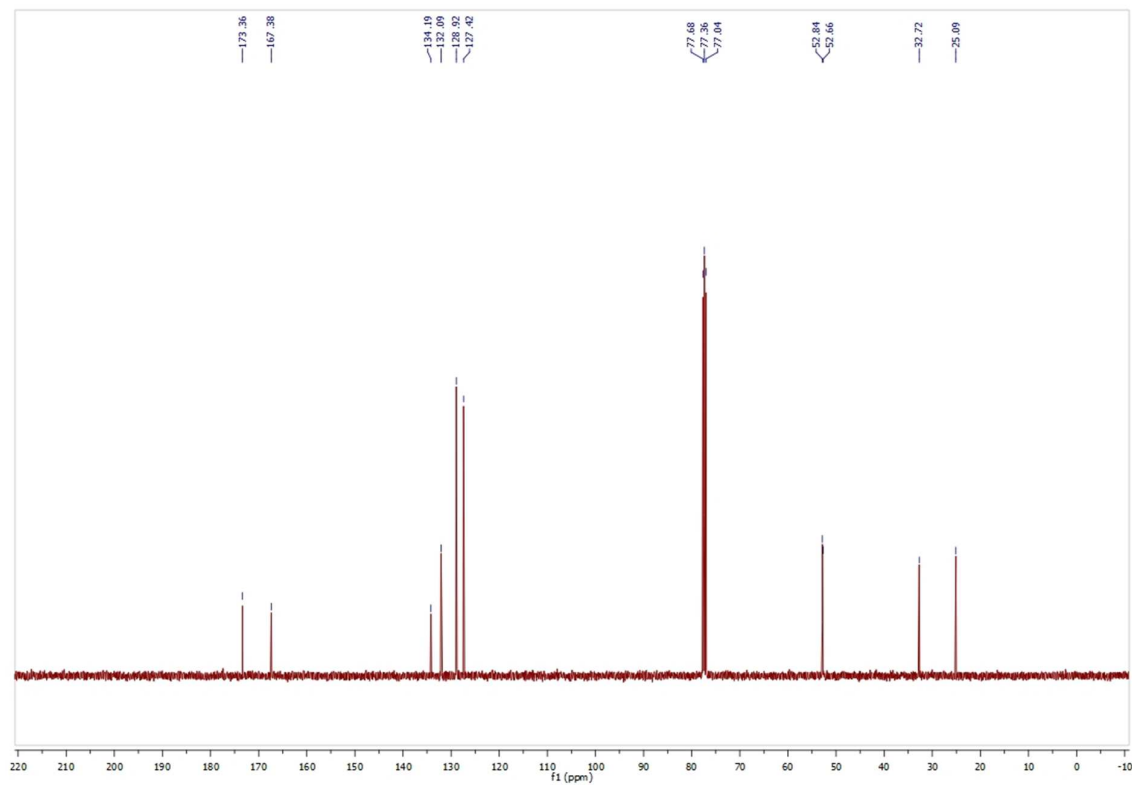(2S,7S)-Dimethyl 2,7-bis(4-(trifluoromethoxy)benzamido)octanedioate (**1**)

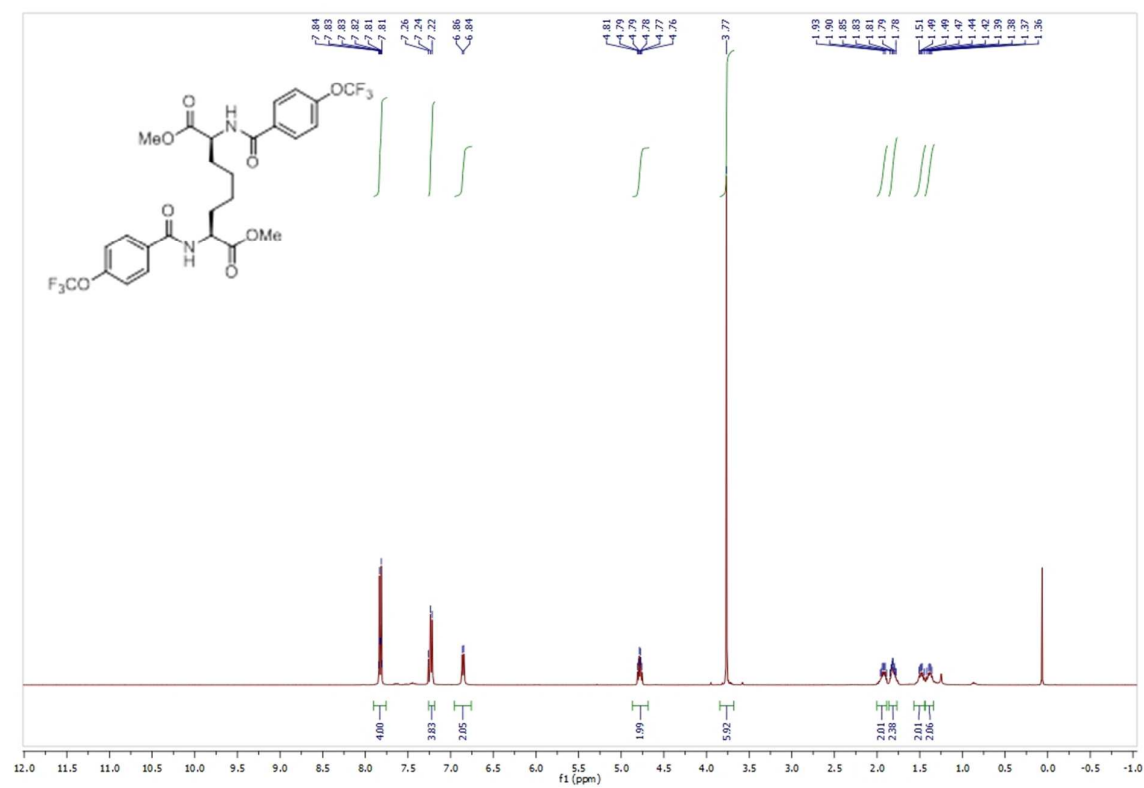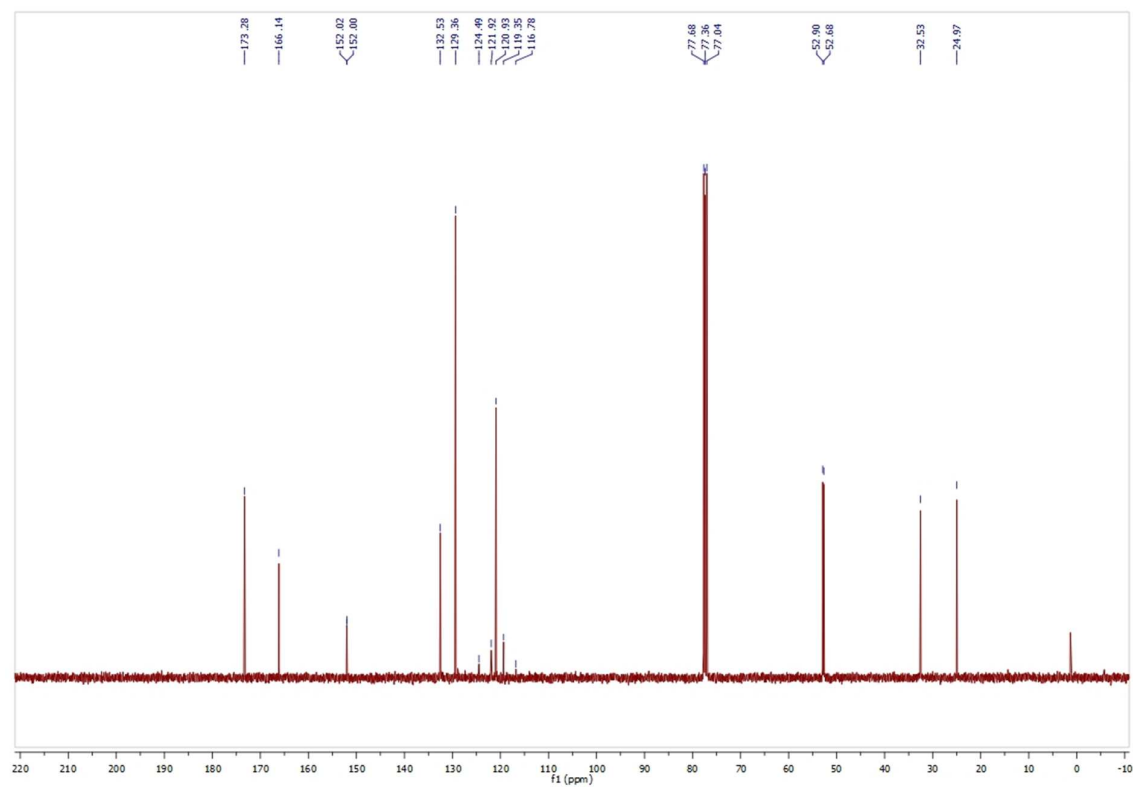(2S,7S)-Dimethyl 2,7-diacetamidooctanedioate (**3**) + unreduced impurity **15**

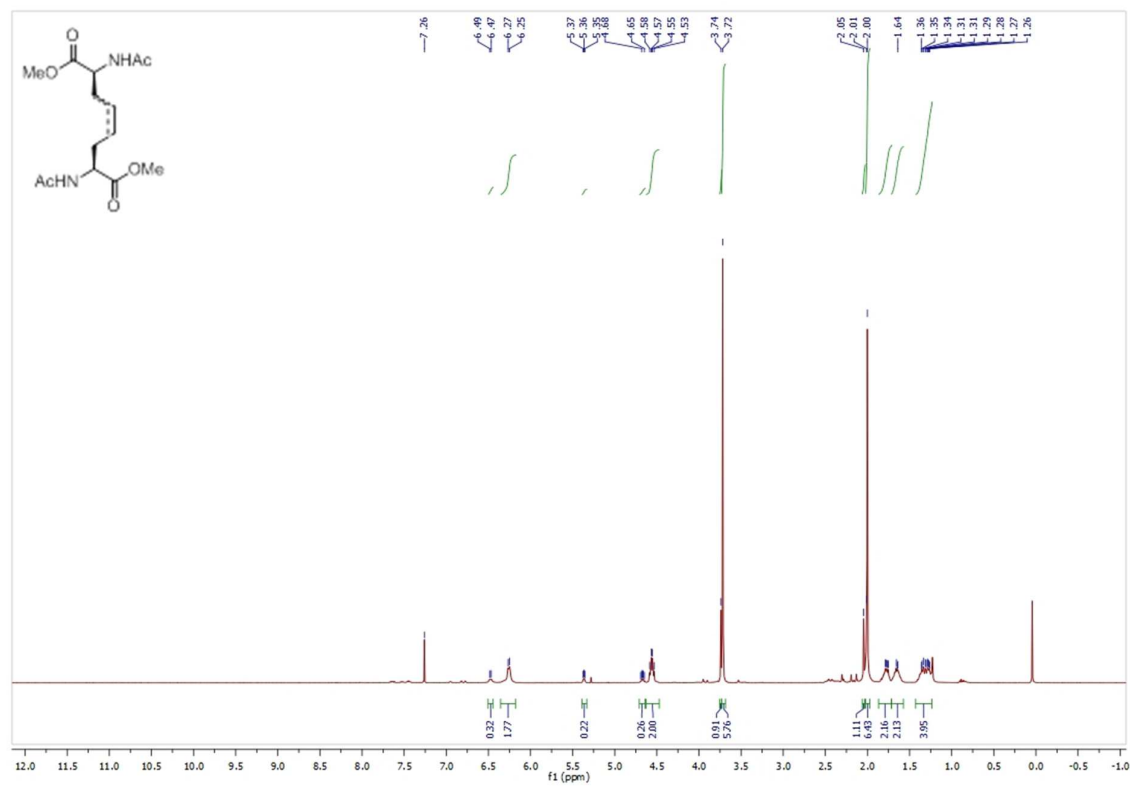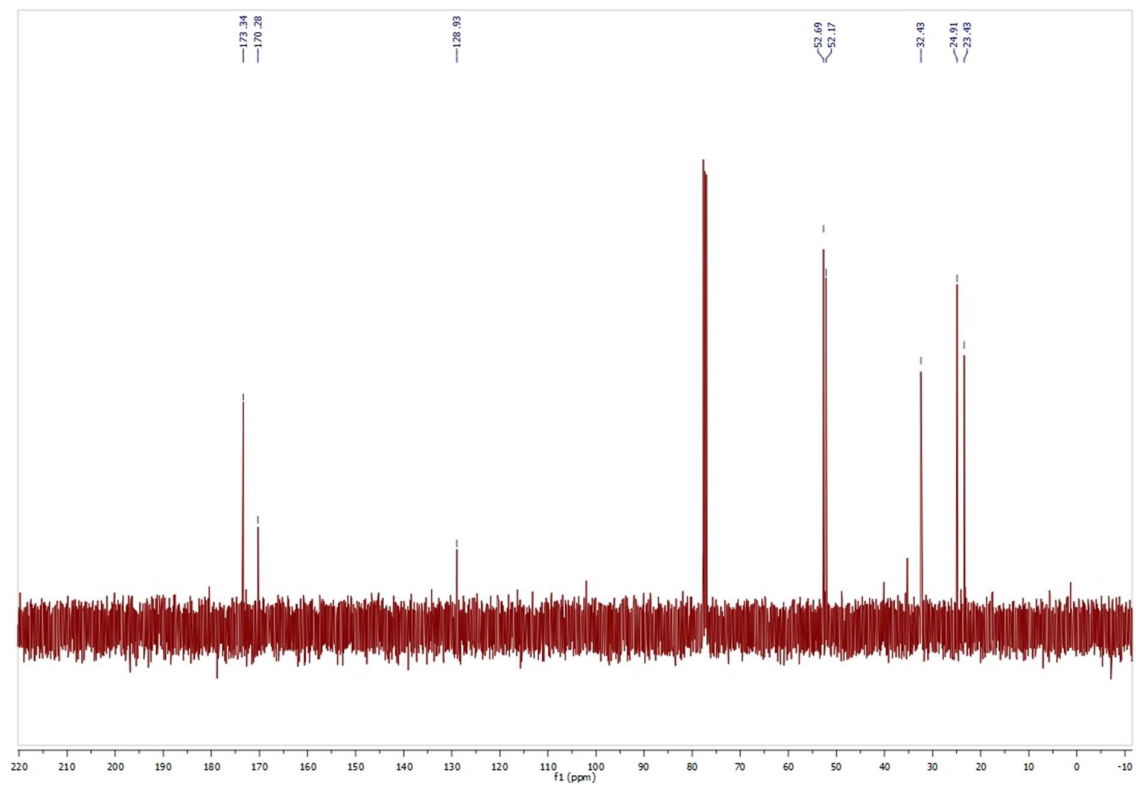(2S,7S)-Dimethyl 2,7-diacetamidooctanedioate (**3**)

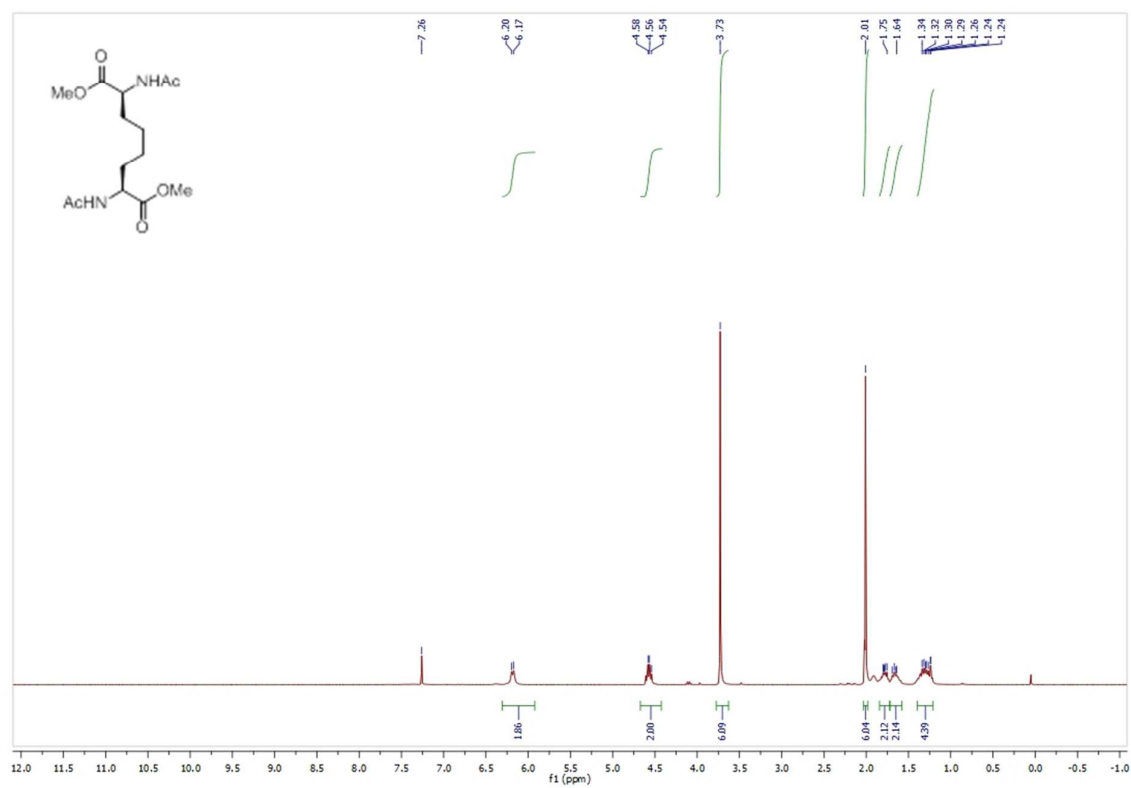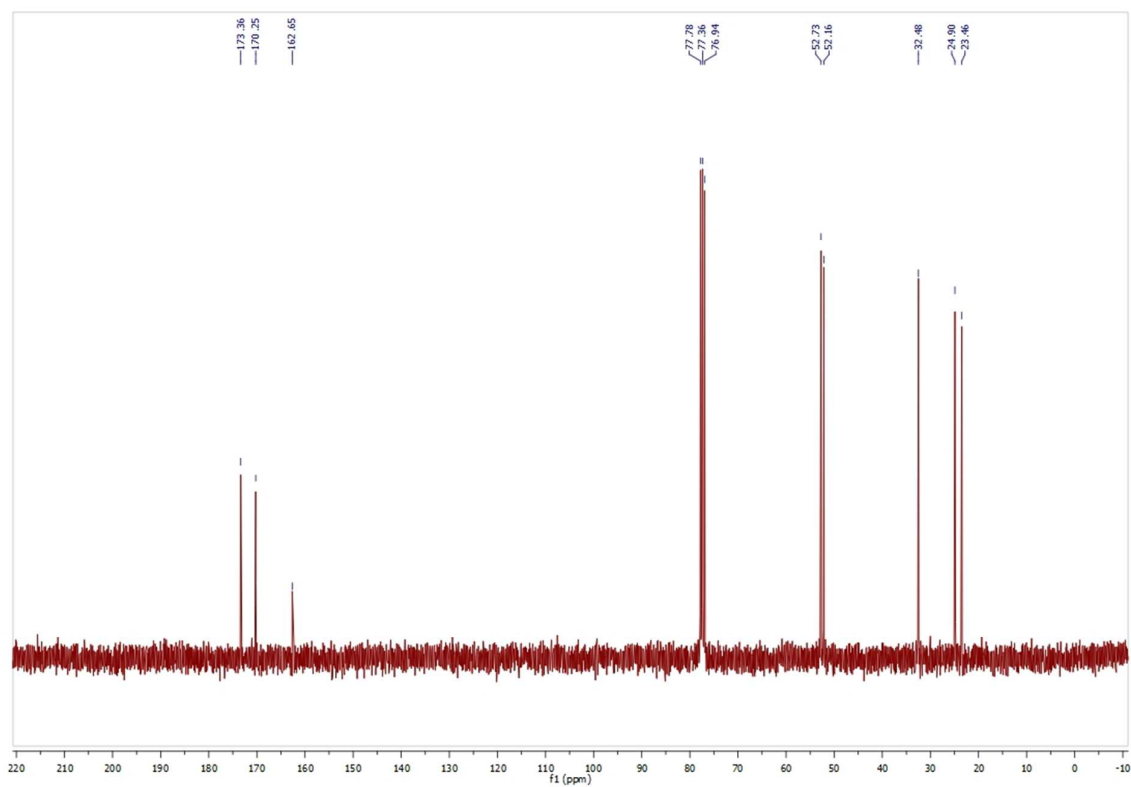

Supplement: Supplementary file 1 [file 3763858]
